# 1 **Molecular Crowding Facilitates Bundling of IMPDH Polymers and** 2 **Cytoophidium Formation**

3

4 Chia-Chun Chang<sup>1</sup>, Min Peng<sup>2</sup>, Jiale Zhong<sup>1</sup>, Ziheng Zhang<sup>1</sup>, Gerson Dierley  
5 Keppeke<sup>1, 3</sup> Li-Ying Sung<sup>2,4</sup>, Ji-Long Liu<sup>1,5</sup>\*

6

7 <sup>1</sup>School of Life Science and Technology, ShanghaiTech University, Shanghai  
8 201210, China

9 <sup>2</sup>Institute of Biotechnology, National Taiwan University, Taipei 106, Taiwan

10 <sup>3</sup>Rheumatology Division, Escola Paulista de Medicina, Universidade Federal de  
11 Sao Paulo, Sao Paulo, SP 04023-062, Brazil

12 <sup>4</sup>Agricultural Biotechnology Research Center, Academia Sinica, Taipei 115,  
13 Taiwan

14 <sup>5</sup>Department of Physiology, Anatomy and Genetics, University of Oxford, Oxford,  
15 OX1 3PT, United Kingdom

16

17 \*Corresponding author. Email: [liujl3@shanghaitech.edu.cn](mailto:liujl3@shanghaitech.edu.cn);  
18 [jilong.liu@dpag.ox.ac.uk](mailto:jilong.liu@dpag.ox.ac.uk)

19

20 **Abstract**

21

22 The cytoophidium is a unique type of membraneless compartment comprising  
23 of filamentous protein polymers. Inosine monophosphate dehydrogenase  
24 (IMPDH) catalyzes the rate-limiting step of *de novo* GTP biosynthesis and plays  
25 critical roles in active cell metabolism. However, the molecular regulation of  
26 cytoophidium formation is poorly understood. Here we show that human  
27 IMPDH2 polymers bundle up to form cytoophidium-like aggregates in vitro when  
28 macromolecular crowders are present. The self-association of IMPDH polymers  
29 is suggested to rely on electrostatic interactions. In cells, the increase of  
30 molecular crowding with hyperosmotic medium induces cytoophidia, while the  
31 decrease of that by the inhibition of RNA synthesis perturbs cytoophidium  
32 assembly. In addition to IMPDH, CTPS and PRPS cytoophidium could be also  
33 induced by hyperosmolality, suggesting a universal phenomenon of  
34 cytoophidium-forming proteins. Finally, our results indicate that the  
35 cytoophidium can prolong the half-life of IMPDH, which is proposed to be one  
36 of conserved functions of this subcellular compartment.

37

38 **Keywords:** Cellular compartmentation; membraneless organelle; cytoophidium;  
39 IMPDH; molecular crowding

40

41

42

## 43 **Introduction**

44

45 Membraneless organelles, such as processing body (P-body), Cajal body and  
46 stress granules, are special compartment of proteins and/or RNAs, and  
47 responsible for diverse biological functions of the cell. Among them, a unique  
48 type of protein aggregates, the cytoophidium (cellular snake in Greek), is formed  
49 by large bundles of filamentous polymers of functional proteins (Liu, 2016). The  
50 cytoophidium initially designates a distinctive compartment of CTP synthase  
51 (CTPS) in *Drosophila* tissues (Liu, 2010). Soon later, some studies have  
52 discovered similar filament-forming properties of other metabolic enzymes and  
53 applied the name to novel intracellular filaments in various organisms, such as  
54 asparagine synthase (ASNS) cytoophidium, pyrroline-5-carboxylate synthase  
55 (P5CS) cytoophidium and inosine monophosphate dehydrogenase (IMPDH)  
56 cytoophidium (Carcamo et al., 2011; Chang et al., 2015; Zhang et al., 2020;  
57 Zhang et al., 2018).

58

59 In mammalian models, CTPS and IMPDH are the best-known cytoophidium-  
60 forming enzymes. Previously, the polymer structures of CTPS and IMPDH have  
61 been resolved by cryo-EM (Anthony et al., 2017; Johnson and Kollman, 2020;  
62 Lynch et al., 2017; Lynch and Kollman, 2020). The CTPS polymer is composed  
63 by CTPS tetramers and able to moderate the end-product inhibition by CTP

64 binding (Lynch et al., 2017; Zhou et al., 2019). Similarly, IMPDH octamers can  
65 stack back-to-back to form filaments and thereby enhance the activity in the  
66 presence of the allosteric inhibitor GTP (Anthony et al., 2017; Johnson and  
67 Kollman, 2020). Forming the cytoophidium can also attenuate CTPS  
68 ubiquitination and protect CTPS from proteasomal degradation (Lin et al., 2018;  
69 Sun and Liu, 2019a). Assembly of both CTPS and IMPDH cytoophidium has  
70 been shown positively correlated with mTORC activity, active glycolysis and  
71 rapid cell proliferation in cell types including lymphocytes and certain cancers,  
72 suggesting their physiological importance (Calise et al., 2018; Chang et al.,  
73 2015; Duong-Ly et al., 2018; Keppeke et al., 2019; Keppeke et al., 2018; Peng  
74 et al., 2021; Sun and Liu, 2019b).

75

76 IMPDH catalyzes the conversion of IMP to XMP, which is the rate-limiting step  
77 of *de novo* GTP biosynthesis. The precise regulation of IMPDH activity is critical  
78 in the coordination of metabolic pathways and cellular status. Specific point  
79 mutations on IMPDH1 and IMPDH2 can result in retinopathy and neuropathy,  
80 respectively (Bowne et al., 2006; Burrell and Kollman, 2022; Zech et al., 2020).  
81 More recently, researchers have linked the elevation of IMPDH expression and  
82 activity with the increase of rRNA and tRNA synthesis, which promotes tumor  
83 progression (Kofuji et al., 2019). Meanwhile, an increased number of cells with  
84 IMPDH cytoophidia has been observed in acral melanomas (Keppeke et al.,  
85 2019). Therefore, IMPDH has long been considered as a promising drug target  
86 for autoimmune diseases, viral infection and some cancers (Hedstrom, 2009).

87 Given accumulative evidences implying the significance of IMPDH  
88 cytoophidium in areas including rheumatology, immunology and oncology, we  
89 seek to investigate the underlying mechanisms of IMPDH cytoophidium  
90 formation.

91

92 In this study, we show that IMPDH polymers can self-associate into large  
93 bundles in the presence of molecular crowders. The negative charge at the  
94 loop<sup>214-217</sup> of human IMPDH2 may play a critical role in interpolymer interactions.

95 In cells, IMPDH cytoophidium assembly is initiated with the formation of an  
96 amorphous clump, which is in association with the ER and can rapidly transform  
97 into filaments. The aggregation of IMPDH polymers is regulated by the  
98 molecular crowding. While the reduction of intracellular macromolecules with  
99 the inhibition of RNA synthesis attenuates drug-induced IMPDH cytoophidia, the  
100 increase of molecular crowding with hyperosmotic medium stimulates the  
101 formation of CTPS, PRPS and IMPDH cytoophidium. In the cells with  
102 cytoophidia, the IMPDH display longer half-life, suggesting that the  
103 cytoophidium protects its component proteins from degradation. Our findings  
104 reveal molecular mechanisms of the regulation and formation of IMPDH  
105 cytoophidium and imply the general function of this cellular compartment.

106

## 107 **Results**

108

### 109 **Molecular crowders trigger in vitro bundling of IMPDH polymers**

110 The cytoophidium in micron-scale size is demonstrated to be a large bundle of  
111 filamentous polymers (Chakraborty et al., 2020; Ingerson-Mahar et al., 2010;  
112 Thomas et al., 2012). We have previously shown that CTPS and IMPDH form  
113 separate cytoophidia in the cell (Chang et al., 2018; Chang et al., 2015).  
114 Although interactions between two cytoophidia may present, CTPS and IMPDH  
115 polymers do not mix up within the same micron-scale filament. These suggest  
116 that the interactions holding filamentous polymers together have certain  
117 specificity.

118

119 Filamentous polymers of the autosomal dominant retinopathy 10 (adRP10)  
120 related mutant human IMPDH1<sup>D226N</sup> recombinant can spontaneously aggregate  
121 into bundles in vitro, while the wildtype protein can only form separate polymers  
122 under the same condition (Labesse et al., 2013). However, the presence of  
123 macromolecular crowder Ficoll-70 triggers further aggregation of wildtype  
124 human IMPDH2 polymers, implying that cytoophidium assembly may solely rely  
125 on the interaction between polymers, which could be enhanced by the increase  
126 of molecular crowding (Fernandez-Justel et al., 2019).

127

128 To test this notion, we attempted to reconstitute IMPDH cytoophidium in vitro  
129 with human IMPDH2 recombinant protein and the supplementation of molecular

130 crowder polyethylene glycol (PEG-4000). When pure human IMPDH2 protein  
131 was examined with negative staining, many polymers were observed (Figure  
132 1A). Additional ATP (100  $\mu$ M) in the mixture considerably increased the amount  
133 and the length of polymers, but all polymers remained separate (Figure 1B).  
134 Strikingly, when the PEG-4000 was added into the mixture at the concentration  
135 of 100 mg/ml, microns long bundles were observed (Figure 1C). The increase  
136 of PEG concentration did not enlarge the bundles, but rendered large networks  
137 of tangled bundles (Figure 1D).

138

### 139 **IMPDH polymers interact through electrostatic interactions**

140 The formation of filamentous aggregates has been proposed to be driven by  
141 electrostatic interactions and the steric compatibility of such protein filaments  
142 (Petrovska et al., 2014). Electrostatic interactions are relatively weak and  
143 transient interactions that are regulated by salt, pH, post-translational  
144 modifications and the protein concentrations (Dumetz et al., 2008).

145

146 We analyzed the electrostatic surface potential of human IMPDH2 polymer with  
147 a structural model (PDB ID: 6U8N) and found the loop<sup>214-217</sup>, which comprises  
148 of two aspartate and two glutamate, at the Bateman domain displays intense  
149 negative charge (Figure 2A-C). The sequence comparison between different  
150 IMPDH isoforms of human, mouse and zebrafish, in which species the  
151 filamentation of IMPDH has been reported, shows that at least two of these four  
152 residues are with negative charge in all IMPDH sequences (Figure 2D). To

153 assess whether the negative charge at the loop<sup>214-217</sup> is required for the inter-  
154 polymer interactions within the cytoophidium, we replaced all four residues with  
155 alanine (hIMPDH2<sup>4A</sup>). Subsequently, we induced cytoophidia in HEK 293T cells  
156 overexpressing wildtype hIMPDH2 or hIMPDH2<sup>4A</sup> with mycophenolic acid (MPA)  
157 for 2 hours. MPA is an IMPDH specific inhibitor and can effectively stimulate  
158 IMPDH cytoophidium formation in many cell types and organisms (Carcamo et  
159 al., 2011; Ji et al., 2006; Keppeke et al., 2015; Keppeke et al., 2021). As the  
160 result, while long IMPDH filaments were observed in most cells overexpressing  
161 wildtype hIMPDH2, most hIMPDH2<sup>4A</sup> expressing cells could only form small  
162 clumps (Figure 2E and F), suggesting that negative charge at the loop<sup>214-217</sup>  
163 participates in the interaction within the filament. Notably, since the endogenous  
164 wildtype IMPDH proteins were also present in transfected cells, patterns of  
165 cytoophidia could be affected by the ratio of wildtype and mutant IMPDH.

166

### 167 **Cytoophidium assembly goes through a state transition**

168 In order to understand the initiation of cytoophidium assembly, we captured the  
169 early phases of the process. In wildtype HeLa cells, small IMPDH cytoophidia  
170 could be found in cells in just a few minutes upon the MPA induction (Figure 3A).  
171 Surprisingly, some IMPDH aggregates without clear filamentous appearance  
172 were observed in a small portion of cells treated with MPA for less than 5  
173 minutes (Figure 3A). In an OFP-IMPDH2 overexpressing HeLa cell line, many  
174 OFP-IMPDH clumps were intertwined with or surrounded by the ER (Figure 3B-  
175 E). Intriguingly, these OFP-IMPDH2 clumps can remain in the cell for more than



176 an hour in some cases (Figure 3B). We then performed live-cell imaging on  
177 OFP-IMPDH2 overexpressing cells to observe the dynamics of these IMPDH  
178 clumps. These amorphous IMPDH clumps can migrate, fuse with one another  
179 and split in association of ER dynamics (Figure 3E and F). Occasionally, we  
180 observed the transition of a clump from its amorphous state into a filament,  
181 showing that the such an amorphous IMPDH clump is the precursor of the  
182 filamentous cytoophidium (Figure 3G). Since the electrostatic interaction  
183 requires precise pairing of specific domains of the proteins, we suspect that the  
184 bulky fluorescent tag may destabilize inter-polymer interactions and thereby  
185 delay their condensation and transformation. The same phenomenon has not  
186 been not observed when the fluorescent tag was replaced by small tags.

187

188 Therefore, we hypothesize that the assembly of IMPDH cytoophidium is initiated  
189 with the loose connections between filamentous polymers, which results in an  
190 amorphous state. Subsequent transformation into the filaments would be  
191 achieved by the accumulation of interactions between long polymers. Such  
192 interactions may be regulated by concentrations of IMPDH polymers and local  
193 macromolecules. The dynamics of membrane-bound organelles, such as ER,  
194 may also contribute to the regulation.

195

### 196 **Hyperosmolality triggers rapid and reversible cytoophidium assembly**

197 To test if the formation of the IMPDH cytoophidium is controlled by molecular  
198 crowding in the cell, we treated the cells with hyperosmotic medium, which

199 would rapidly dehydrate the cells, thereby increasing concentrations of  
200 intracellular solutes. HEK 293T cells were cultured in the medium containing  
201 sucrose at concentrations ranging from 25 mM to 300 mM for one hour before  
202 fixation. While no enrichment of cytoophidia was observed in cells treated with  
203 25 mM and 50 mM sucrose, medium with 100 mM and 150 mM sucrose induced  
204 mature cytoophidia in 18.9% and 54.7% of cells, respectively (Figure 4A and B).  
205 Other cell lines, including HeLa cells, MCF7 cells and HCT116 cells also  
206 exhibited increasing numbers of IMPDH cytoophidia in a dose-dependent  
207 manner, showing that cytoophidium assembly induced by hyperosmotic  
208 medium is a general phenomenon in human cells (Figure 4C and D).

209  
210 Interestingly, nearly all cells treated with hyperosmotic medium with 300 mM  
211 sucrose displayed IMPDH cytoophidia (Figure 4). It is known that the formation  
212 of protein dimer, oligomer or polymer is preferable in the crowded milieu in order  
213 to minimize the excluded volume and overall crowding (Ralston, 1990). Rapid  
214 and reversible formation of large protein aggregates and membraneless  
215 organelles could be induced by hyperosmolality (Jalihal et al., 2020). When HEK  
216 293T cells were treated with 300 mM sucrose, a great amount of small IMPDH  
217 filaments appeared in all cells within 3 minutes of culture (Figure 5A). These  
218 IMPDH cytoophidia will undergo elongation and fusion, eventually forming a few  
219 large ones (Figure 5A). Conversely, when the medium was replaced with  
220 isosmotic medium, these large cytoophidia completely disassociated within 5  
221 minutes, indicating that hyperosmolality-induced IMPDH cytoophidium

222 formation is also a rapid and reversible process (Figure 5B).

223

224 The polymerization of IMPDH octamers is controlled by the conformational  
225 changes, which is determined by the binding of ATP and GTP (Anthony et al.,  
226 2017; Johnson and Kollman, 2020). Consistently, IMPDH cytoophidia in cells  
227 could be disrupted by elevating intracellular GTP levels with the treatment of  
228 guanosine or GTP (Ji et al., 2006; Keppeke et al., 2018). When HEK 293T cells  
229 were pre-treated with guanosine, the MPA-induced cytoophidium assembly was  
230 prohibited (Figure 5C). However, the same pre-treatment failed to prevent  
231 IMPDH filamentation induced by hyperosmotic medium with 300 mM sucrose,  
232 suggesting that filament-forming proteins may undergo polymerization  
233 regardless the ordinary regulation when cytoplasmic crowding reaches certain  
234 levels (Figure 5D and E).

235

236 Polymerization and cytoophidium-forming properties have been revealed in an  
237 increasing number of enzymes over the last decade. Since the excluded volume  
238 effect is a general physical principle of macromolecules, IMPDH cytoophidium  
239 is unlikely the only protein filament induced by hyperosmolality. In mammalian  
240 models, CTPS and PRPS are two other cytoophidium-forming enzymes  
241 supported by multiple studies (Begovich et al., 2020; Gou et al., 2014; Lin et al.,  
242 2018; Noree et al., 2019). By performing the immunostaining on HEK 293T cells  
243 treated with hyperosmotic medium for 3 hours, we found CTPS and PRPS  
244 cytoophidia in most of cells (Figure 5F). The treatment of 300 mM sorbitol was

245 applied to the cells as the sucrose substitute and that also induced these three  
246 types of cytoophidia in most cells (Figure 5G). The localization of some other  
247 enzymes, including PAICS, GMPS and HPRT in these cells were also examined  
248 but no filamentous structure was found (Figure S1).

249

250 The polymer structures of IMPDH2 and CTPS1 have been resolved and Y12A  
251 of IMPDH2 and H355A of CTPS1 mutations were employed to disrupt the  
252 interaction between neighboring protomers in previous studies (Anthony et al.,  
253 2017; Johnson and Kollman, 2020; Lynch et al., 2017). To test if the formation  
254 of filamentous polymers is still a prerequisite of assembling large filaments  
255 under hyperosmolality, HEK 293T cells were transfected with constructs  
256 encoding GFP-P2A-IMPDH2<sup>Y12A</sup> or Flag-CTPS1<sup>H355A</sup> mutant proteins and their  
257 wildtype counterparts before being treated with hyperosmotic medium. While  
258 cells overexpressing wildtype IMPDH2 showed large cytoophidia under the  
259 treatment, dispersed patterns of IMPDH were observed in most cells expressing  
260 mutant IMPDH2 (Figure 5H). Similarly, CTPS cytoophidium assembly under this  
261 condition was impaired in cells overexpressing mutant CTPS1 (Figure 5I).  
262 These suggest that only filamentous polymers can assemble filamentous  
263 aggregates under hyperosmotic conditions.

264

265 We also treated GFP-hIMPDH2<sup>WT</sup> overexpressing HEK 293T cells with  
266 hyperosmotic medium in order to observe the formation of cytoophidia in live  
267 cells. However, only aggregates in the appearance of dots or short speckles

268 were observed, suggesting that the inter-polymer interactions were interfered  
269 by the bulky tags in hyperosmotic conditions (Figure S2)

270

### 271 **Inhibition of RNA synthesis perturbs IMPDH cytoophidium assembly**

272 Ribosomes are one of the most abundant macromolecules in the cell and serve  
273 as crowders for tuning the cytoplasmic viscosity and the effective diffusion  
274 coefficient of macromolecules (Delarue et al., 2018). We treated HEK 293T cells  
275 with CX-5461, an inhibitor of RNA polymerase I, for 3 hours prior to the  
276 supplementation of MPA for 15 and 30 minutes. The rRNA synthesis was  
277 monitored with the incorporation of 5-ethynyl-uridine (EU) in nucleoli, which  
278 labels newly synthesized RNAs (Figure 6A and C). The amounts of cytoophidia  
279 in size exceeding a threshold ( $> 3 \text{ pixel}^2$ ) were quantified. Significantly fewer  
280 cytoophidia were found in cells upon 15 minutes of MPA induction (Figure 6A).  
281 However, no significant difference was shown when the duration of MPA  
282 treatment was extended to 30 minutes (Figure 6A and C), suggesting that the  
283 inhibition of rRNA synthesis delays but not prohibits IMPDH cytoophidium  
284 assembly.

285

286 Next, we wondered if the inhibition of global transcription, which should reduce  
287 the concentrations of total RNAs, ribosomes and proteins in the cell, would  
288 render more prominent defects on cytoophidium formation. HEK 293T cells  
289 were treated with actinomycin D (ACTD), a compound prevents the elongation  
290 of RNA chains, for 1 hour before the supplementation of MPA. After 30 minutes

291 of MPA induction, significantly fewer cytoophidia were observed (Figure 6B and  
292 C). However, such a reduction of cytoophidia was not seen in cells pre-treated  
293 with MPA prior to ACTD treatment, suggesting that only the cytoophidium  
294 undergoing aggregation would be apparently perturbed by the drug. In order to  
295 confirm that the perturbation of cytoophidium assembly is due to the decrease  
296 of intracellular crowding, 25 mM, 50 mM and 100 mM sucrose was applied to  
297 the ACTD-treated cells to restore the crowding and cytoophidium assembly.  
298 While IMPDH failed to form detectable cytoophidia in most of ACTD treated cells  
299 in the medium with sucrose under 50 mM, nearly all cells were observed with  
300 cytoophidia in medium with 100 mM sucrose. (Figure 6D and E).

301

### 302 **The cytoophidium prolongs IMPDH half-life**

303 Proteins located in intracellular inclusion bodies and other large aggregates,  
304 such as aggresomes and amyloids, are known to be more resistant to  
305 proteasomal degradation. In addition, CTPS cytoophidium formation can reduce  
306 CTPS ubiquitination and degradation by the proteasome in mammalian cells  
307 (Lin et al., 2018; Sun and Liu, 2019a). We suspected that the protection of  
308 component proteins from degradation is a common feature of different types of  
309 cytoophidia. To test this hypothesis, we aimed to compare the half-life of IMPDH  
310 protein in the cells with and without IMPDH cytoophidia.

311

312 HeLa cells were transfected with constructs encoding Myc-IMPDH2<sup>WT</sup> and Myc-  
313 IMPDH<sup>Y12A</sup>, of which the expression is driven by a TRE-promoter. We harnessed

314 the Tet-off system to manipulate the expression of the exogenous IMPDH2.  
315 Notably, the formation of cytoophidia could not be induced solely by IMPDH2  
316 overexpression. In order to compare the half-life of exogenous IMPDH2 proteins  
317 in the cells with and without IMPDH cytoophidia, transfected cells were treated  
318 with MPA or DAU together with the doxycycline, which turns off the expression  
319 of exogenous IMPDH2. While MPA inhibits GTP biosynthesis and induces  
320 IMPDH cytoophidia, DAU inhibits CTP biosynthesis but does not induce IMPDH  
321 cytoophidia (Figure 7A). Thus, nucleotide synthesis and cell proliferation were  
322 impaired in both conditions but IMPDH cytoophidia should be present only in  
323 the culture with MPA. Western blotting was used to detect the remaining Myc-  
324 IMPDH2 in the treated cells (Figure 7B). While the level of Myc-IMPDH2  
325 decreased by about 20% in MPA-treated Myc-IMPDH<sup>WT</sup> expressing cells, levels  
326 of Myc-IMPDH2 dropped by about 60% in the other groups (Figure 7C). These  
327 results suggest that the half-life of IMPDH proteins is longer in cells with the  
328 cytoophidia, supporting the notion that the cytoophidium can protect component  
329 proteins from degradation.

330

331

## 332 **Discussion**

333

334 The mechanisms and functions of protein aggregations have been intensively  
335 studied for decades. Many of them are known to comprise of unfolded or  
336 misfolded proteins and being associated with disorders and aging. For example,  
337 amyloid is a highly ordered fibrillar protein aggregate assembled by tau, prions  
338 and other proteins that feature the unique quaternary structure of  $\beta$ -sheets (Chiti  
339 and Dobson, 2017). Another well-known example, aggresomes, are dense  
340 inclusion bodies that sequester unfolded and misfolded proteins through highly  
341 regulated process (Kopito, 2000). In contrast, the cytoophidium is assembled  
342 by the aggregation of functional, correctly folded proteins and is normally  
343 reversible. Apart from being a storage spot of particular proteins, the  
344 cytoophidium is more likely an apparatus for regulating metabolic flux and other  
345 cellular functions. Therefore, the cytoophidium might be regarded as specialized  
346 protein aggregation, which serves as to regulate various functions of multivalent  
347 filament-forming proteins.

348

349 It has been demonstrated that the ER can regulate the dynamics of  
350 membraneless organelles like P-bodies and stress granules (Lee et al., 2020).  
351 At the early phase of cytoophidium assembly in cells, we find that IMPDH  
352 polymers form amorphous clumps, which would usually transform into compact  
353 filaments within minutes (Figure 3A and G). These IMPDH clumps are also



354 associated with the ER and undergo fusion and fission (Figure 3C-F),  
355 suggesting that the ER may play a role in the formation and regulation of IMPDH  
356 cytoophidium.

357

358 Electrostatic interactions often require high protein concentrations and changes  
359 in salt or pH. The formation of multiple filamentous macrostructures in budding  
360 yeast have been shown to be induced by the change of pH, implying that the  
361 cytoophidium is assembled through the self-association of filamentous  
362 polymers (Hansen et al., 2021; Petrovska et al., 2014). Our findings support this  
363 notion as the presence of molecular crowders is sufficient to trigger purified  
364 human IMPDH2 proteins to reconstitute cytoophidium-like macrostructures  
365 (Figure 1). The negative charge at the loop<sup>214-217</sup> of human IMPDH2 is possibly  
366 responsible for the interactions between polymers (Figure 2).

367

368 The effective concentration of interacting components is known to be critical to  
369 the establishment of interactions within protein aggregates. In some cases, the  
370 effective concentration of proteins could be modulated by expression levels and  
371 the crowding conditions of the cell. Yet, overexpression of CTPS and IMPDH is  
372 not sufficient to induce the cytoophidium in mammalian cells (Chang et al.,  
373 2018). In contrast, treatments of inhibitors such as DON and MPA could  
374 effectively induce CTPS and IMPDH cytoophidium assembly without changing  
375 expression levels of CTPS and IMPDH significantly (Keppeke et al., 2018; Lin  
376 et al., 2018). Since the polymers, but not oligomers, are the actual protomers of

377 the cytoophidium, the concentration of protein polymers could be more  
378 important than their expression levels for cytoophidium assembly. Thus, the  
379 regulation of cytoophidium should be a combination of protein polymerization  
380 and the interaction between polymers, which could be regulated by ligand  
381 binding and the molecular crowding, respectively.

382

383 Approximately 40% of the cell volume is occupied by macromolecules, making  
384 the cytoplasm a crowded substance. Our data indicate that intracellular  
385 crowding plays an important role in the formation of the cytoophidium. In all  
386 tested cell lines, the numbers of detectable IMPDH cytoophidia were increased  
387 by the supplementation of sucrose in a dose-dependent manner (Figure 4).  
388 Conversely, the reduced molecular crowding by the inhibition of the synthesis  
389 of RNAs impaired the assembly of MPA-induced IMPDH cytoophidium (Figure  
390 6). Ribosomal crowding has been demonstrated to be tuned by mTORC1  
391 signaling pathway and can regulate the dynamics of various membraneless  
392 compartments (Delarue et al., 2018). These may partially explain the fact that  
393 the formation of IMPDH and CTPS cytoophidium is positively correlated with  
394 mTORC activity in eukaryotes (Andreadis et al., 2019; Chang et al., 2015; Sun  
395 and Liu, 2019b). Considering that the IMPDH and CTPS cytoophidium may  
396 function as an activity booster, this machinery may couple the metabolic and  
397 cellular status through the adjustment of molecular crowding.

398

399 When cells were treated with 300 mM sucrose or sorbitol, IMPDH, CTPS and

400 PRPS simultaneously assembled into the cytoophidium (Figure 5D). These  
401 hyperosmotic conditions might be applied for a quick validation for the  
402 cytoophidium-forming capability of particular proteins. Although the regulation  
403 of the polymerization differs among proteins, such a universal condition for the  
404 simulation of cytoophidium assembly can provide a handy strategy for future  
405 studies.

406

407 On the other hand, the component proteins of dense protein aggregates such  
408 as amyloid and aggresome are known to be more resistant to the proteasomal  
409 degradation. Aggresomes are thought to be degraded through autophagy, one  
410 of the pathways by which large cellular structures are degraded (Garcia-Mata  
411 et al., 2002; Kopito, 2000). The degradation of amyloid, however, may require  
412 specialized proteases (Ries and Sastre, 2016). Previously, the formation of the  
413 cytoophidium has been reported to protect the CTPS from proteasomal  
414 degradation (Sun and Liu, 2019a). Consistently, we show that the cytoophidium  
415 can also prolong the half-life of IMPDH, suggesting this may be a common  
416 feature of the cytoophidium (Figure 7).

417

418 The physical state of biomolecular aggregates may determine certain properties  
419 of the compartment. For example, free diffusion of molecules may present in  
420 the liquid state, whereas in the gel and solid states, the molecular diffusion is  
421 more restricted. IMPDH cytoophidium is seemingly a gel-like structure as the  
422 component proteins exhibited no flow in a previous fluorescence recovery after

423 photobleaching (FRAP) analysis (Chang et al., 2018). In addition, a dense  
424 structure of the cytoophidium has been revealed with EM (Juda et al., 2014).  
425 These features implicate that the diffusion of molecules might be restricted in  
426 IMPDH cytoophidium. However, other evidences indicate that the occurrence of  
427 IMPDH assembly reflects the upregulation of GTP biosynthetic pathway or the  
428 increase of GTP consumption, suggesting that the cytoophidium is a catalytic  
429 active structure (Calise et al., 2018; Chang et al., 2015; Duong-Ly et al., 2018;  
430 Keppeke et al., 2018; Plana-Bonamaiso et al., 2020). Therefore, we propose  
431 that the architecture of the cytoophidium could act like a percolated system that  
432 allows the diffusion of its ligands, which are small molecules, but not of  
433 macromolecules. In other words, the large bundle of protein polymers may  
434 separate the interior proteins from other macromolecules while their catalytic  
435 reaction is less affected (Figure 8).

436

437 In consistency with this model, the formation of CTPS cytoophidium was found  
438 to significantly attenuate the ubiquitination of CTPS (Sun and Liu, 2019a). In  
439 addition, the bundling of the translation initiation factor eIF2B filaments can  
440 downregulate general protein translation (Nuske et al., 2020). These could be  
441 led by reduced interactions between cytoophidium components and RNAs or  
442 proteins. IMPDH can act as a transcriptional and translational regulator in some  
443 models (Kozhevnikova et al., 2012; McLean et al., 2004; Mortimer et al., 2008).  
444 In human cancer cells, IMPDH has been shown to directly interact with other  
445 proteins including Y-box binding protein 1 (YB-1), Ras-related C3 botulinum

446 toxin substrate 1 (RAC1), and circular RNAs (Bianchi-Smiraglia et al., 2021;  
447 Ruan et al., 2020; Wang et al., 2021). The regulation of these moonlight  
448 functions of IMPDH may be also correlated with the cytoophidium.

449

450 Taken together, in this study we clearly demonstrate that the bundling of IMPDH  
451 polymers is facilitated by molecular crowding and requires no other protein  
452 components. In mammalian cells, the assembly of IMPDH cytoophidium could  
453 be triggered by the increase of the concentration of IMPDH polymers and the  
454 intracellular crowding. The same mechanism might be projected to other  
455 cytoophidium-forming proteins. In addition, we show that the cytoophidium can  
456 prolong the half-life of IMPDH, suggesting a common function of different types  
457 of cytoophidia. Future researches are required to further explore each  
458 cytoophidium-forming protein and construct the general features of this growing  
459 protein family.

460

461

462

## 463 **Materials and Methods**

464

### 465 **Cell culture and transfection**

466 Human HEK 293T, HeLa, MCF7 and HCT116 cells were cultured in Dulbecco's  
467 modified Eagle's medium with high glucose, glutamine (SH30022.01, Hyclone)  
468 and supplemented with 10% FBS (Biological Industries) and 1% Penicillin-  
469 Streptomycin (60162ES76, YEASEN). Cells were kept in a 37 °C humid  
470 incubator with 5% CO<sub>2</sub>. The hyperosmotic medium was prepared with the  
471 supplementation of sucrose or sorbitol in the cultured medium with  
472 concentrations denoted in each experiment. MPA (M3536, Sigma-Aldrich), CX-  
473 5461 (HY-13323, Medchemexpress) and actinomycin D (SBR00013, Sigma-  
474 Aldrich), MPA (M3536, SigmaAldrich) and DAU (sc-394445, Santa Cruz  
475 Biotechnology) were supplemented into the culture medium in different  
476 experiments as described. Constructs encoding CMV-promoter driven OFP-  
477 hIMPDH2, GFP-IMPDH2, GFP-Sec61β, OFP-P2A-IMPDH2, OFP-P2A-  
478 IMPDH2<sup>Y12A</sup>, Flag-CTPS1, Flag-CTPS1<sup>H355</sup> and TRE-promoter driven myc-  
479 IMPDH2 and myc-IMPDH2<sup>Y12A</sup> were delivered into HEK 293T or HeLa cells with  
480 TurboFect™ transfection reagent (R0532, ThermoFisher). The expression of  
481 myc-IMPDH2 was turn off with culture medium containing 1 µg/ml doxycycline  
482 (ab141091, Abcam).

483

### 484 **Immunofluorescence**

485 Cells were fixed with 4% paraformaldehyde in PBS for 10 minutes at room

486 temperature. All antibodies were diluted in 1:500 dilution in PBS containing  
487 2.5% BSA (A116563, Aladdin) and 0.25% Triton-X100 (X100, Sigma-Aldrich).  
488 Fixed samples were washed with PBS and incubated with primary antibody at  
489 room temperature for more than two hours. After washing with PBS, samples  
490 were then stained with secondary antibody at room temperature for about 2  
491 hours. Mouse monoclonal anti-Flag (F1804, Sigma-Aldrich), mouse monoclonal  
492 anti-Myc (sc-40, Santa Cruz Biotechnology), rabbit polyclonal anti-IMPDH2  
493 (12948-1-AP, ProteinTech), rabbit polyclonal anti-CTPS1 (15914-1-AP,  
494 ProteinTech), rabbit polyclonal anti-PRPS1 (15549-1-AP, ProteinTech), rabbit  
495 polyclonal anti-PAICS (GTX118341, GeneTex), rabbit polyclonal anti-GMPS  
496 (GTX114225, GeneTex), rabbit polyclonal anti-HPRT (GTX113466, GeneTex)  
497 Alexa Fluor 647-conjugated goat anti-mouse IgG (A21235, Invitrogen) and  
498 Alexa Fluor 488-conjugated donkey anti-rabbit IgG (A-21206, Invitrogen)  
499 antibodies were used.

500

### 501 **IMPDH cytoophidium in vitro reconstitution and negative staining**

502 Same amount (1  $\mu$ M) of purchased Human IMPDH2 recombinant protein (8349-  
503 DH-050, R&D systems) was incubated in 50 mM HEPES buffer (pH 8.5)  
504 containing 100  $\mu$ M ATP and PEG-4000 at concentrations of 0, 100 or 200 mg/ml.  
505 The mixture was incubated at room temperature on with vertical shaking (200  
506 r.p.m.) for 1 hour. The polymerization and bundling of IMPDH were analyzed  
507 with negative staining. Human IMPDH2 recombinant protein samples from the  
508 in vitro bundling procedures were loaded onto hydrophilic carbon-coated grids

509 (400mech, Zhongjingkeyi Technology Co). The grids were then washed once  
510 with 0.1% uranium formate and dyed with 0.5% uranium formate. Imaging was  
511 performed on a 120 kV microscope (Talos L120C, ThermoFisher) with an Eagle  
512 4 K x 4 K CCD camera system (Ceta CMOS, ThermoFisher).

513

### 514 **Live-cell imaging**

515 OFP-IMP2H2 expressing HeLa cells on glass bottom chamber slides (C8-1.5H-  
516 N, Cellvis) with medium containing 100  $\mu$ M MPA (M3536, Sigma-Aldrich), and  
517 maintained at room temperature when live-cell imaging was performed with a  
518 Leica SP8 STED 3X confocal microscope (Leica).

519

### 520 **5-ethynyl uridine (EU) labelling**

521 For EU incorporation, 30 min before fixation cells were incubated with 100  $\mu$ M  
522 of EU (69075-42-9, Bidepharm). After 4% PFA fixation, a Click-iT™ (C10643,  
523 ThermoFisher) reaction was performed to bind Alexa Fluor 647 molecule to the  
524 EU incorporated to newly synthesized RNA. All procedures were performed  
525 according to the manufacturer protocol.

526

### 527 **Western blotting**

528 Cell lysates were prepared with RIPA lysis buffer (20-188, Millipore) and  
529 quantitated for the amount of protein using a Bio-Rad Protein Assay Kit  
530 (5000002, Bio-Rad). Samples were run on a 12% polyacrylamide gel. PVDF  
531 membranes (GE Healthcare) were used for protein transfer. For



532 immunolabelling, primary and secondary antibodies were incubated overnight  
533 diluted in PBST + 5% milk. Antibody labelling was revealed with SuperSignal  
534 West Pico Chemiluminescent Substrate (34579, ThermoFisher) and visualized  
535 in the chemiluminescence imaging system (GeneGnome XRQ, Syngene).  
536 Antibodies used: mouse anti-Myc monoclonal (9E10) antibody (1:1000, sc-40,  
537 SantaCruz); HRP-conjugated mouse monoclonal anti-ACTB antibody (1:3000,  
538 HRP-60008, ProteinTech). HRP-conjugated goat polyclonal anti-mouse IgG  
539 antibody (1:6000, 31430, ThermoFisher).

540

#### 541 **Image analysis**

542 All image-based quantification, including the number of nuclei and cytoophidia  
543 and fluorescence intensity, was analyzed with the software Fiji. The number of  
544 cell nuclei and percentage of cells with cytoophidia were counted manually. The  
545 quantification of the number of cytoophidia shown in figure 6C were performed  
546 with “analyze particles” and only particle size  $> 3 \text{ pixel}^2$  were counted.

547

#### 548 **Statistical analysis**

549 Statistical analysis was performed in the software GraphPad Prism by using  
550 unpaired two-tailed Student's *t*-tests or one-way ANOVA and Tukey's test as  
551 denoted in the captions. All the quantification was from at least three repeats,  
552 and more than 100 cells were counted for each quantification. All error bars  
553 shown in graphs represent S. E. M.

554

555 **References**

556

557 Andreadis, C., L. Hulme, K. Wensley, and J.L. Liu. 2019. The TOR pathway modulates  
558 cytoophidium formation in *Schizosaccharomyces pombe*. *The Journal of biological*  
559 *chemistry*. 294:14686-14703.

560 Anthony, S.A., A.L. Burrell, M.C. Johnson, K.C. Duong-Ly, Y.M. Kuo, J.C. Simonet, P. Michener, A.  
561 Andrews, J.M. Kollman, and J.R. Peterson. 2017. Reconstituted IMPDH polymers  
562 accommodate both catalytically active and inactive conformations. *Molecular biology of*  
563 *the cell*.

564 Begovich, K., D. Yelon, and J.E. Wilhelm. 2020. PRPS polymerization influences lens fiber  
565 organization in zebrafish. *Dev Dyn*. 249:1018-1031.

566 Bianchi-Smiraglia, A., D.W. Wolff, D.J. Marston, Z. Deng, Z. Han, S. Moparthy, R.M. Wombacher, A.L.  
567 Mussell, S. Shen, J. Chen, D.H. Yun, A. O'Brien Cox, C.M. Furdui, E. Hurley, M.L. Feltri, J. Qu,  
568 T. Hollis, J.B.N. Kengne, B. Fongang, R.J. Sousa, M.E. Kandel, E.S. Kandel, K.M. Hahn, and M.A.  
569 Nikiforov. 2021. Regulation of local GTP availability controls RAC1 activity and cell  
570 invasion. *Nature communications*. 12:6091.

571 Bowne, S.J., L.S. Sullivan, S.E. Mortimer, L. Hedstrom, J. Zhu, C.J. Spellicy, A.I. Gire, D. Hughbanks-  
572 Wheaton, D.G. Birch, R.A. Lewis, J.R. Heckenlively, and S.P. Daiger. 2006. Spectrum and  
573 frequency of mutations in IMPDH1 associated with autosomal dominant retinitis  
574 pigmentosa and leber congenital amaurosis. *Investigative ophthalmology & visual science*.  
575 47:34-42.

576 Burrell, A.L., and J.M. Kollman. 2022. IMPDH dysregulation in disease: a mini review. *Biochem Soc*  
577 *Trans*. 50:71-82.

- 578 Calise, S.J., G. Abboud, H. Kasahara, L. Morel, and E.K.L. Chan. 2018. Immune Response-  
579 Dependent Assembly of IMP Dehydrogenase Filaments. *Frontiers in immunology*. 9:2789.
- 580 Carcamo, W.C., M. Satoh, H. Kasahara, N. Terada, T. Hamazaki, J.Y. Chan, B. Yao, S. Tamayo, G. Covini,  
581 C.A. von Muhlen, and E.K. Chan. 2011. Induction of cytoplasmic rods and rings structures  
582 by inhibition of the CTP and GTP synthetic pathway in mammalian cells. *PloS one*.  
583 6:e29690.
- 584 Chakraborty, A., W.C. Lin, Y.T. Lin, K.J. Huang, P.Y. Wang, I.Y. Chang, H.I. Wang, K.T. Ma, C.Y. Wang,  
585 X.R. Huang, Y.H. Lee, B.C. Chen, Y.J. Hsieh, K.Y. Chien, T.Y. Lin, J.L. Liu, L.Y. Sung, J.S. Yu, Y.S.  
586 Chang, and L.M. Pai. 2020. SNAP29 mediates the assembly of histidine-induced CTP  
587 synthase filaments in proximity to the cytokeratin network. *Journal of cell science*. 133.
- 588 Chang, C.C., G.D. Keppeke, L.Y. Sung, and J.L. Liu. 2018. Interfilament interaction between IMPDH  
589 and CTPS cytoophidia. *FEBS J*. 285:3753-3768.
- 590 Chang, C.C., W.C. Lin, L.M. Pai, H.S. Lee, S.C. Wu, S.T. Ding, J.L. Liu, and L.Y. Sung. 2015.  
591 Cytoophidium assembly reflects upregulation of IMPDH activity. *Journal of cell science*.  
592 128:3550-3555.
- 593 Chiti, F., and C.M. Dobson. 2017. Protein Misfolding, Amyloid Formation, and Human Disease: A  
594 Summary of Progress Over the Last Decade. *Annu Rev Biochem*. 86:27-68.
- 595 Delarue, M., G.P. Brittingham, S. Pfeffer, I.V. Surovtsev, S. Pinglay, K.J. Kennedy, M. Schaffer, J.I.  
596 Gutierrez, D. Sang, G. Poterewicz, J.K. Chung, J.M. Plitzko, J.T. Groves, C. Jacobs-Wagner, B.D.  
597 Engel, and L.J. Holt. 2018. mTORC1 Controls Phase Separation and the Biophysical  
598 Properties of the Cytoplasm by Tuning Crowding. *Cell*. 174:338-349 e320.
- 599 Dumetz, A.C., A.M. Chockla, E.W. Kaler, and A.M. Lenhoff. 2008. Effects of pH on protein-protein  
600 interactions and implications for protein phase behavior. *Biochimica et biophysica acta*.

- 601 1784:600-610.
- 602 Duong-Ly, K.C., Y.M. Kuo, M.C. Johnson, J.M. Cote, J.M. Kollman, J. Soboloff, G.F. Rall, A.J. Andrews,  
603 and J.R. Peterson. 2018. T cell activation triggers reversible inosine-5'-monophosphate  
604 dehydrogenase assembly. *Journal of cell science*. 131.
- 605 Fernandez-Justel, D., R. Nunez, J. Martin-Benito, D. Jimeno, A. Gonzalez-Lopez, E.M. Soriano, J.L.  
606 Revuelta, and R.M. Buey. 2019. A Nucleotide-Dependent Conformational Switch Controls  
607 the Polymerization of Human IMP Dehydrogenases to Modulate their Catalytic Activity. *J*  
608 *Mol Biol*. 431:956-969.
- 609 Garcia-Mata, R., Y.S. Gao, and E. Sztul. 2002. Hassles with taking out the garbage: aggravating  
610 aggresomes. *Traffic*. 3:388-396.
- 611 Gou, K.M., C.C. Chang, Q.J. Shen, L.Y. Sung, and J.L. Liu. 2014. CTP synthase forms cytoophidia in  
612 the cytoplasm and nucleus. *Experimental cell research*. 323:242-253.
- 613 Hansen, J.M., A. Horowitz, E.M. Lynch, D.P. Farrell, J. Quispe, F. DiMaio, and J.M. Kollman. 2021.  
614 Cryo-EM structures of CTP synthase filaments reveal mechanism of pH-sensitive  
615 assembly during budding yeast starvation. *eLife*. 10.
- 616 Hedstrom, L. 2009. IMP dehydrogenase: structure, mechanism, and inhibition. *Chemical reviews*.  
617 109:2903-2928.
- 618 Ingerson-Mahar, M., A. Briegel, J.N. Werner, G.J. Jensen, and Z. Gitai. 2010. The metabolic enzyme  
619 CTP synthase forms cytoskeletal filaments. *Nature cell biology*. 12:739-746.
- 620 Jalihal, A.P., S. Pitchiaya, L. Xiao, P. Bawa, X. Jiang, K. Bedi, A. Parolia, M. Cieslik, M. Ljungman, A.M.  
621 Chinnaiyan, and N.G. Walter. 2020. Multivalent Proteins Rapidly and Reversibly Phase-  
622 Separate upon Osmotic Cell Volume Change. *Molecular cell*. 79:978-990 e975.
- 623 Ji, Y., J. Gu, A.M. Makhov, J.D. Griffith, and B.S. Mitchell. 2006. Regulation of the interaction of

- 624 inosine monophosphate dehydrogenase with mycophenolic Acid by GTP. *The Journal of*  
625 *biological chemistry*. 281:206-212.
- 626 Johnson, M.C., and J.M. Kollman. 2020. Cryo-EM structures demonstrate human IMPDH2 filament  
627 assembly tunes allosteric regulation. *eLife*. 9.
- 628 Juda, P., J. Smigova, L. Kovacik, E. Bartova, and I. Raska. 2014. Ultrastructure of cytoplasmic and  
629 nuclear inosine-5'-monophosphate dehydrogenase 2 "rods and rings" inclusions. *J*  
630 *Histochem Cytochem*. 62:739-750.
- 631 Keppeke, G.D., D. Barcelos, M. Fernandes, A.N. Comodo, D.P. Guimaraes, L. Cardili, F.C.L. Carapeto,  
632 L.E.C. Andrade, and G. Landman. 2019. IMP dehydrogenase rod/ring structures in acral  
633 melanomas. *Pigment Cell Melanoma Res*.
- 634 Keppeke, G.D., S.J. Calise, E.K. Chan, and L.E. Andrade. 2015. Assembly of IMPDH2-based, CTPS-  
635 based, and mixed rod/ring structures is dependent on cell type and conditions of  
636 induction. *Journal of genetics and genomics = Yi chuan xue bao*. 42:287-299.
- 637 Keppeke, G.D., C.C. Chang, C.L. Antos, M. Peng, L.Y. Sung, L.E.C. Andrade, and J.L. Liu. 2021. IMPDH  
638 forms the cytoophidium in zebrafish. *Dev Biol*. 478:89-101.
- 639 Keppeke, G.D., C.C. Chang, M. Peng, L.Y. Chen, W.C. Lin, L.M. Pai, L.E.C. Andrade, L.Y. Sung, and J.L.  
640 Liu. 2018. IMP/GTP balance modulates cytoophidium assembly and IMPDH activity. *Cell*  
641 *Div*. 13:5.
- 642 Kofuji, S., A. Hirayama, A.O. Eberhardt, R. Kawaguchi, Y. Sugiura, O. Sampetean, Y. Ikeda, M.  
643 Warren, N. Sakamoto, S. Kitahara, H. Yoshino, D. Yamashita, K. Sumita, K. Wolfe, L. Lange,  
644 S. Ikeda, H. Shimada, N. Minami, A. Malhotra, S. Morioka, Y. Ban, M. Asano, V.L. Flanary, A.  
645 Ramkissoon, L.M.L. Chow, J. Kiyokawa, T. Mashimo, G. Lucey, S. Mareninov, T. Ozawa, N.  
646 Onishi, K. Okumura, J. Terakawa, T. Daikoku, T. Wise-Draper, N. Majd, K. Kofuji, M. Sasaki,

- 647 M. Mori, Y. Kanemura, E.P. Smith, D. Anastasiou, H. Wakimoto, E.C. Holland, W.H. Yong, C.  
648 Horbinski, I. Nakano, R.J. DeBerardinis, R.M. Bachoo, P.S. Mischel, W. Yasui, M. Suematsu,  
649 H. Saya, T. Soga, I. Grummt, H. Bierhoff, and A.T. Sasaki. 2019. IMP dehydrogenase-2 drives  
650 aberrant nucleolar activity and promotes tumorigenesis in glioblastoma. *Nature cell*  
651 *biology*. 21:1003-1014.
- 652 Kopito, R.R. 2000. Aggresomes, inclusion bodies and protein aggregation. *Trends Cell Biol.*  
653 10:524-530.
- 654 Kozhevnikova, E.N., J.A. van der Knaap, A.V. Pindyurin, Z. Ozgur, W.F. van Ijcken, Y.M. Moshkin, and  
655 C.P. Verrijzer. 2012. Metabolic enzyme IMPDH is also a transcription factor regulated by  
656 cellular state. *Molecular cell*. 47:133-139.
- 657 Labesse, G., T. Alexandre, L. Vaupre, I. Salard-Arnaud, J.L. Him, B. Raynal, P. Bron, and H. Munier-  
658 Lehmann. 2013. MgATP regulates allostery and fiber formation in IMPDHs. *Structure*.  
659 21:975-985.
- 660 Lee, J.E., P.I. Cathey, H. Wu, R. Parker, and G.K. Voeltz. 2020. Endoplasmic reticulum contact sites  
661 regulate the dynamics of membraneless organelles. *Science*. 367.
- 662 Lin, W.C., A. Chakraborty, S.C. Huang, P.Y. Wang, Y.J. Hsieh, K.Y. Chien, Y.H. Lee, C.C. Chang, H.Y. Tang,  
663 Y.T. Lin, C.S. Tung, J.D. Luo, T.W. Chen, T.Y. Lin, M.L. Cheng, Y.T. Chen, C.T. Yeh, J.L. Liu, L.Y.  
664 Sung, M.S. Shiao, J.S. Yu, Y.S. Chang, and L.M. Pai. 2018. Histidine-Dependent Protein  
665 Methylation Is Required for Compartmentalization of CTP Synthase. *Cell reports*. 24:2733-  
666 2745 e2737.
- 667 Liu, J.L. 2010. Intracellular compartmentation of CTP synthase in *Drosophila*. *Journal of genetics*  
668 *and genomics = Yi chuan xue bao*. 37:281-296.
- 669 Liu, J.L. 2016. The Cytoophidium and Its Kind: Filamentation and Compartmentation of

- 670 Metabolic Enzymes. *Annual review of cell and developmental biology*. 32:349-372.
- 671 Lynch, E.M., D.R. Hicks, M. Shepherd, J.A. Endrizzi, A. Maker, J.M. Hansen, R.M. Barry, Z. Gitai, E.P.  
672 Baldwin, and J.M. Kollman. 2017. Human CTP synthase filament structure reveals the  
673 active enzyme conformation. *Nature structural & molecular biology*. 24:507-514.
- 674 Lynch, E.M., and J.M. Kollman. 2020. Coupled structural transitions enable highly cooperative  
675 regulation of human CTPS2 filaments. *Nature structural & molecular biology*. 27:42-48.
- 676 McLean, J.E., N. Hamaguchi, P. Belenky, S.E. Mortimer, M. Stanton, and L. Hedstrom. 2004. Inosine  
677 5'-monophosphate dehydrogenase binds nucleic acids in vitro and in vivo. *The*  
678 *Biochemical journal*. 379:243-251.
- 679 Mortimer, S.E., D. Xu, D. McGrew, N. Hamaguchi, H.C. Lim, S.J. Bowne, S.P. Daiger, and L. Hedstrom.  
680 2008. IMP dehydrogenase type 1 associates with polyribosomes translating rhodopsin  
681 mRNA. *The Journal of biological chemistry*. 283:36354-36360.
- 682 Noree, C., K. Begovich, D. Samilo, R. Broyer, E. Monfort, and J.E. Wilhelm. 2019. A quantitative  
683 screen for metabolic enzyme structures reveals patterns of assembly across the yeast  
684 metabolic network. *Molecular biology of the cell*. 30:2721-2736.
- 685 Nuske, E., G. Marini, D. Richter, W. Leng, A. Bogdanova, T.M. Franzmann, G. Pigino, and S. Alberti.  
686 2020. Filament formation by the translation factor eIF2B regulates protein synthesis in  
687 starved cells. *Biology open*. 9.
- 688 Peng, M., C.C. Chang, J.L. Liu, and L.Y. Sung. 2021. CTPS and IMPDH form cytoophidia in  
689 developmental thymocytes. *Experimental cell research*. 405:112662.
- 690 Petrovska, I., E. Nuske, M.C. Munder, G. Kulasegaran, L. Malinowska, S. Kroschwald, D. Richter, K.  
691 Fahmy, K. Gibson, J.M. Verbavatz, and S. Alberti. 2014. Filament formation by metabolic  
692 enzymes is a specific adaptation to an advanced state of cellular starvation. *eLife*.

- 693 Plana-Bonamaiso, A., S. Lopez-Begines, D. Fernandez-Justel, A. Junza, A. Soler-Tapia, J. Andilla, P.  
694 Loza-Alvarez, J.L. Rosa, E. Miralles, I. Casals, O. Yanes, P. de la Villa, R.M. Buey, and A.  
695 Mendez. 2020. Post-translational regulation of retinal IMPDH1 in vivo to adjust GTP  
696 synthesis to illumination conditions. *eLife*. 9.
- 697 Ralston, G.B. 1990. Effects of Crowding in Protein Solutions. *J Chem Educ*. 67:857-860.
- 698 Ries, M., and M. Sastre. 2016. Mechanisms of Abeta Clearance and Degradation by Glial Cells.  
699 *Front Aging Neurosci*. 8:160.
- 700 Ruan, H., Z. Song, Q. Cao, D. Ni, T. Xu, K. Wang, L. Bao, J. Tong, H. Xiao, W. Xiao, G. Cheng, Z. Xiong,  
701 H. Liang, D. Liu, L. Wang, T. Olivier, B.H. Jane, H. Yang, X. Zhang, and K. Chen. 2020.  
702 IMPDH1/YB-1 Positive Feedback Loop Assembles Cytoophidia and Represents a  
703 Therapeutic Target in Metastatic Tumors. *Mol Ther*. 28:1299-1313.
- 704 Sun, Z., and J.L. Liu. 2019a. Forming cytoophidia prolongs the half-life of CTP synthase. *Cell Discov*.  
705 5:32.
- 706 Sun, Z., and J.L. Liu. 2019b. mTOR-S6K1 pathway mediates cytoophidium assembly. *Journal of*  
707 *genetics and genomics = Yi chuan xue bao*. 46:65-74.
- 708 Thomas, E.C., J.H. Gunter, J.A. Webster, N.L. Schieber, V. Oorschot, R.G. Parton, and J.P. Whitehead.  
709 2012. Different characteristics and nucleotide binding properties of inosine  
710 monophosphate dehydrogenase (IMPDH) isoforms. *PloS one*. 7:e51096.
- 711 Wang, S., F. Chao, C. Zhang, D. Han, G. Xu, and G. Chen. 2021. Circular RNA circPFKP promotes cell  
712 proliferation by activating IMPDH2 in prostate cancer. *Cancer letters*. 524:109-120.
- 713 Zech, M., R. Jech, S. Boesch, M. Skorvanek, S. Weber, M. Wagner, C. Zhao, A. Jochim, J. Necpal, Y.  
714 Dincer, K. Vill, F. Distelmaier, M. Stoklosa, M. Krenn, S. Grunwald, T. Bock-Bierbaum, A.  
715 Fecikova, P. Havrankova, J. Roth, I. Prihodova, M. Adamovicova, O. Ulmanova, K. Bechyne,



716 P. Danhofer, B. Vesely, V. Han, P. Pavelekova, Z. Gdovinova, T. Mantel, T. Meindl, A. Sitzberger,  
717 S. Schroder, A. Blaschek, T. Roser, M.V. Bonfert, E. Haberlandt, B. Plecko, B. Leineweber, S.  
718 Berweck, T. Herberhold, B. Langguth, J. Svantnerova, M. Minar, G.A. Ramos-Rivera, M.H.  
719 Wojcik, S. Pajusalu, K. Ounap, U.A. Schatz, L. Polsler, I. Milenkovic, F. Laccone, V. Pilshofer,  
720 R. Colombo, S. Patzer, A. Iuso, J. Vera, M. Troncoso, F. Fang, H. Prokisch, F. Wilbert, M.  
721 Eckenweiler, E. Graf, D.S. Westphal, K.M. Riedhammer, T. Brunet, B. Alhaddad, R. Berutti,  
722 T.M. Strom, M. Hecht, M. Baumann, M. Wolf, A. Telegrafi, R.E. Person, F.M. Zamora, L.B.  
723 Henderson, D. Weise, T. Musacchio, J. Volkmann, A. Szuto, J. Becker, K. Cremer, T. Sycha, F.  
724 Zimprich, V. Kraus, C. Makowski, P. Gonzalez-Alegre, T.M. Bardakjian, L.J. Ozelius, A. Vetro,  
725 R. Guerrini, E. Maier, I. Borggraefe, A. Kuster, S.B. Wortmann, A. Hackenberg, R. Steinfeld,  
726 B. Assmann, C. Staufner, T. Opladen, E. Ruzicka, et al. 2020. Monogenic variants in dystonia:  
727 an exome-wide sequencing study. *Lancet Neurol.* 19:908-918.

728 Zhang, B., O.Y. Tastan, X. Zhou, C.J. Guo, X. Liu, A. Thind, H.H. Hu, S. Zhao, and J.L. Liu. 2020. The  
729 proline synthesis enzyme P5CS forms cytoophidia in *Drosophila*. *Journal of genetics and*  
730 *genomics = Yi chuan xue bao.* 47:131-143.

731 Zhang, S., K. Ding, Q.J. Shen, S. Zhao, and J.L. Liu. 2018. Filamentation of asparagine synthetase in  
732 *Saccharomyces cerevisiae*. *PLoS genetics.* 14:e1007737.

733 Zhou, X., C.J. Guo, H.H. Hu, J. Zhong, Q. Sun, D. Liu, S. Zhou, C.C. Chang, and J.L. Liu. 2019. *Drosophila*  
734 CTP synthase can form distinct substrate- and product-bound filaments. *Journal of*  
735 *genetics and genomics = Yi chuan xue bao.* 46:537-545.

736  
737  
738



740 **Figures 1-8 and Figure Legends**

741

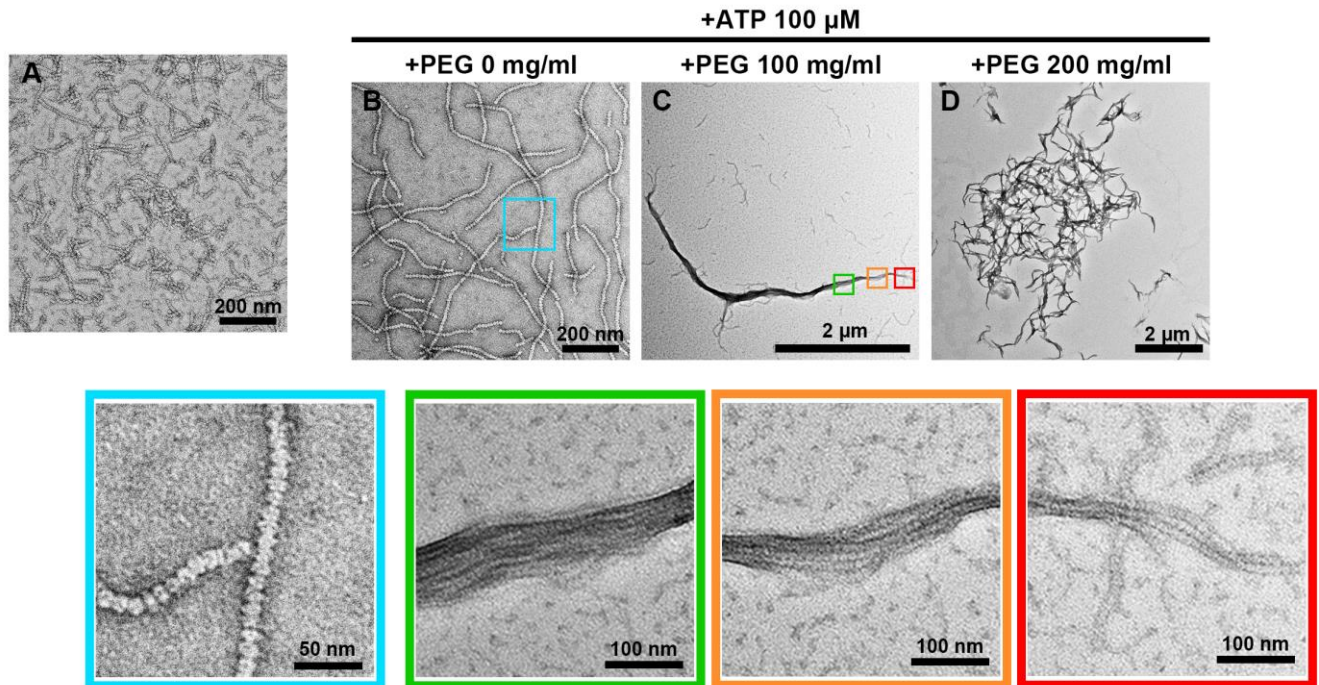

742

743

744 **Figure 1. Molecular crowder PEG-4000 promotes in vitro reconstitution of**

745 **IMP2H2 cytoophidium.** (A-D) Negative staining images of hIMP2H2

746 recombinant protein incubated with different conditions for 1 hour. (A) hIMP2H2

747 protein was incubated in the buffer without the supplementation of ligands. (B-

748 D) hIMP2H2 protein was incubated in the buffer containing 100 μM ATP and

749 PEG-4000 at 0, 100, 200 mg/ml. Lower panels show magnified images of

750 corresponding areas in (B) and (C).

751

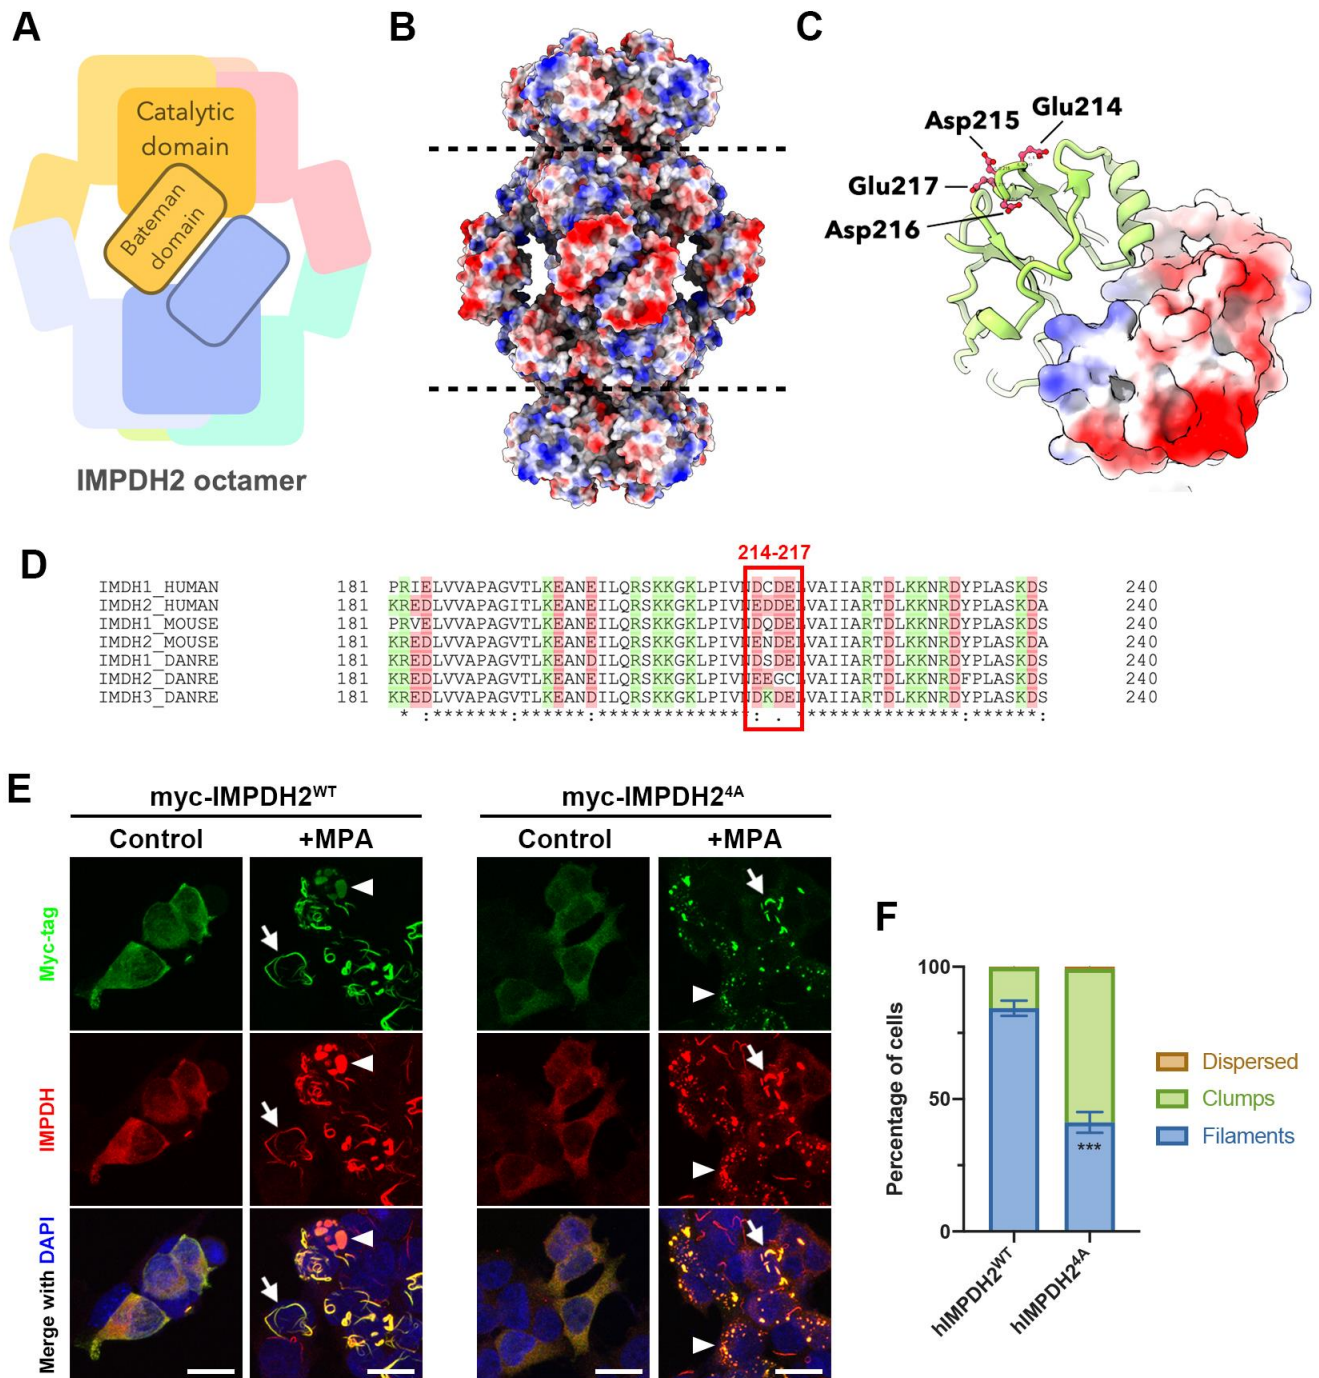

752

753

754 **Figure 2**

755

756 **Figure 2. The mutation at loop<sup>214-217</sup> of human IMPDH2 disturbs the**  
757 **cytoophidium assembly in cells.** (A) Illustration of the IMPDH octamer. (B)  
758 Electrostatic surface model of hIMPDH2 polymer. (C) Electrostatic surface  
759 model of the Bateman domain of hIMPDH2. Residues at loop<sup>214-217</sup> are indicated.  
760 (D) The sequence comparison of the CBS subdomain of human, mouse and  
761 zebrafish IMPDH isoforms. Residues with positive and negative charge are  
762 highlighted in green and red, respectively. (E) Immunofluorescence of HEK  
763 293T cells overexpressing myc-hIMPDH2<sup>WT</sup> and myc-hIMPDH2<sup>4A</sup>. Cells were  
764 treated with MPA for 2 hours before fixation. Cells displaying IMPDH filaments  
765 are indicated with arrows and cells displaying IMPDH clumps are indicated with  
766 arrowheads. Scale bars = 20  $\mu$ m. (F) Quantification of cells displaying different  
767 IMPDH patterns in (E). Error bars = S.E.M. Student's *t* test, \*\*\**p* < 0.001.  
768

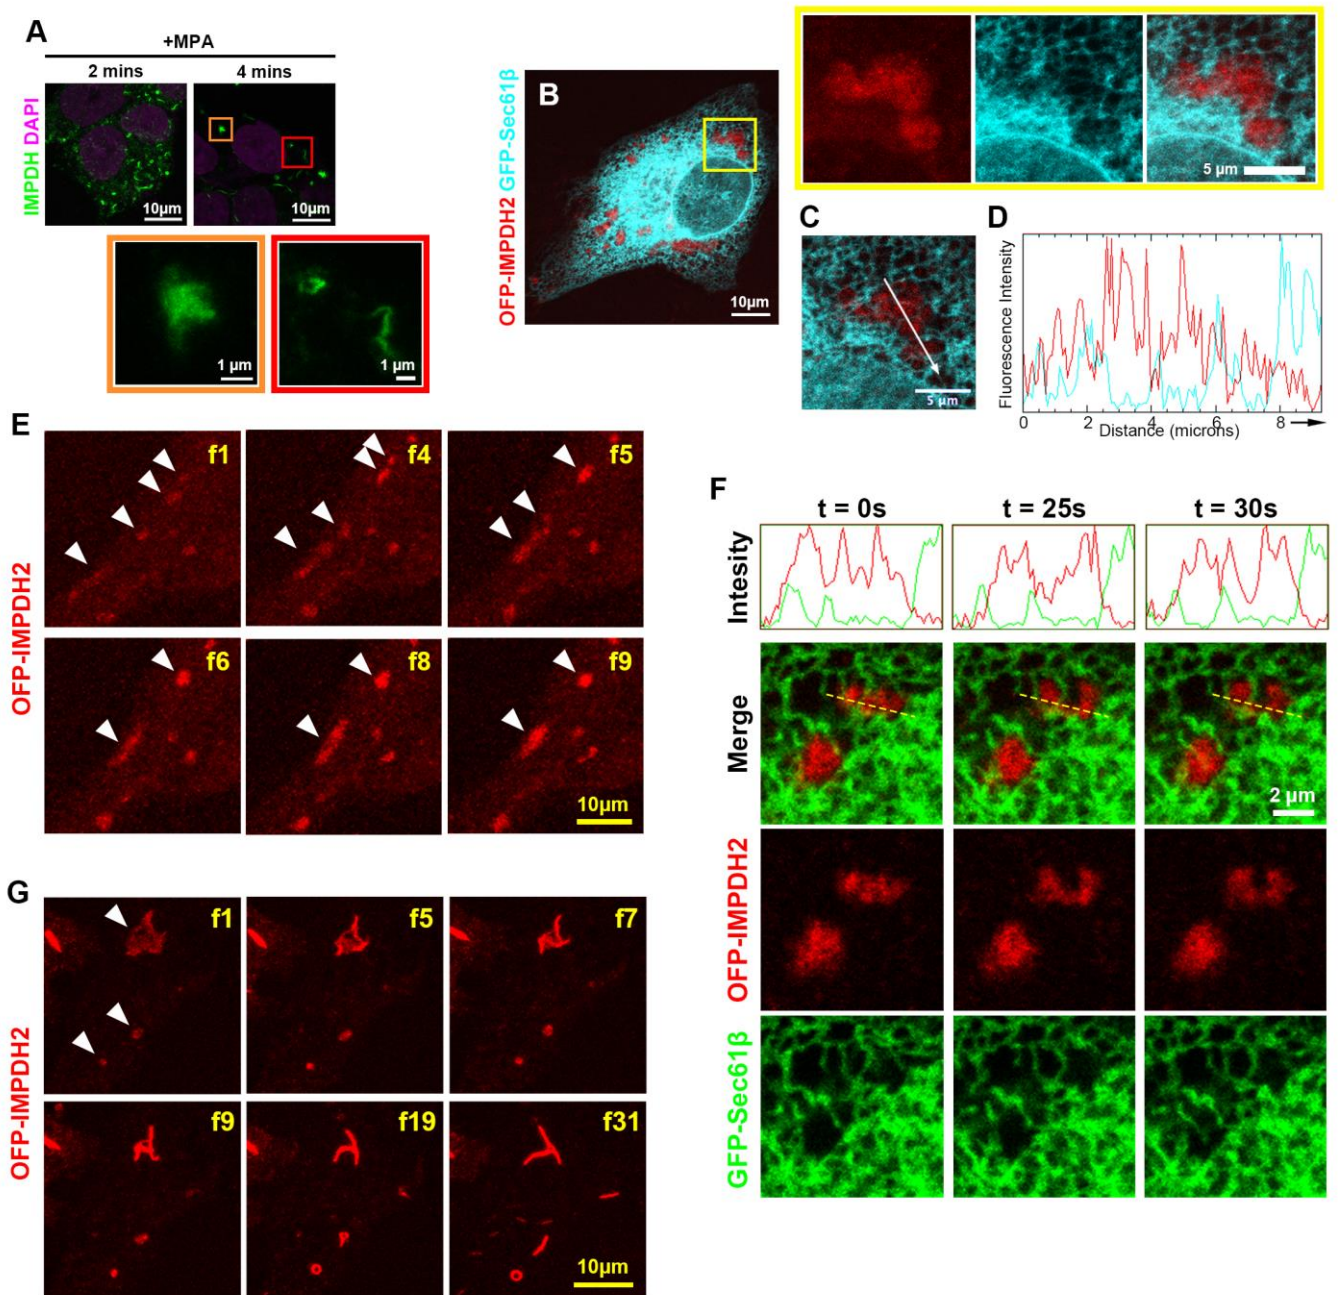

769

770

771 **Figure 3**

772

773 **Figure 3. Amorphous IMPDH clump is the precursor state of the**  
774 **filamentous cytoophidium.** (A) Immunofluorescence of wildtype HeLa cells  
775 treated with MPA for 2 and 4 minutes, respectively. Magnified images of an  
776 amorphous IMPDH clump (orange box) and filamentous cytoophidia (red box)  
777 are corresponding to selected areas in (A). (B) Images of HeLa cells expressing  
778 OFP-IMPDH2 and GFP-Sec61 $\beta$  fusion proteins. Cells were treated with MPA  
779 for 1 hour. Magnified images show an amorphous IMPDH clump surrounded by  
780 the ER in selected areas. (C) Single plane image of the IMPDH clump shown in  
781 magnified images in (B). (D) Fluorescent intensity of OFP-IMPDH2 and GFP-  
782 Sec61 $\beta$  signals in (C). The x axis corresponds to the direction and area of  
783 measurement indicated by the arrow in (C). (E-G) Representative frames of live-  
784 cell imaging of OFP-IMPDH2 expressing HeLa cells treated with MPA. (E)  
785 Selected frames of movie S1 showing the movement and fusion of IMPDH  
786 clumps (arrowheads). (F) Selected frames of movie S2 showing an IMPDH  
787 clump split in association with ER tubule dynamics. The dashed line  
788 corresponds to the area of fluorescence intensity measurement. (G) Selected  
789 frames of movie S3 showing the clump-to-filament transition. Time intervals of  
790 each frame is 40 sec in (E) and 60 sec in (G).

791

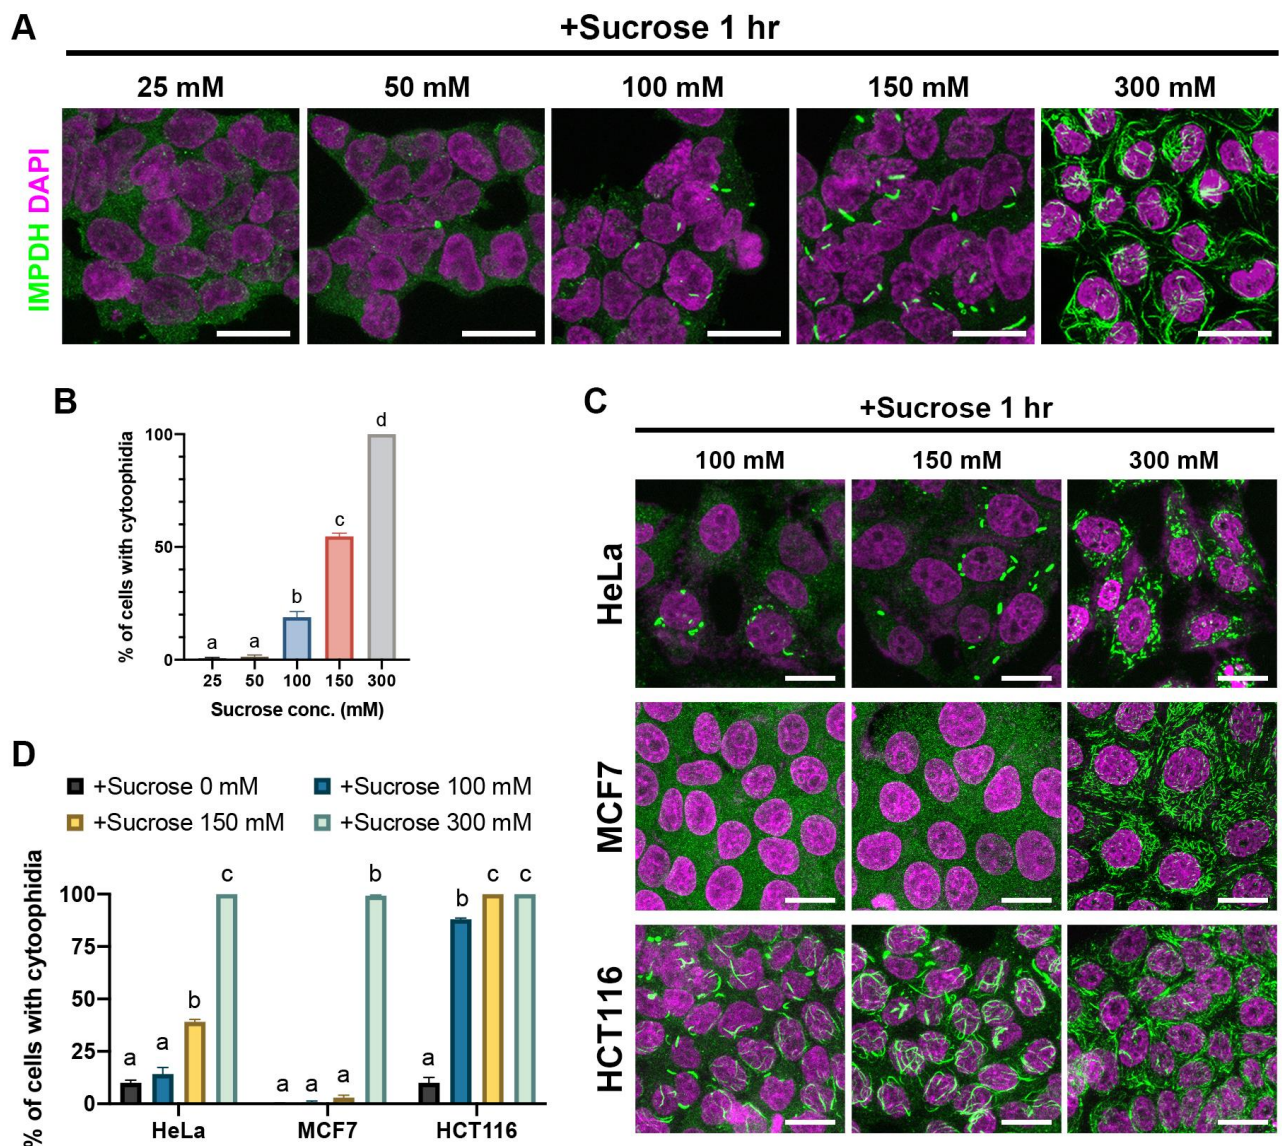

792

793

794 **Figure 4. Hyperosmotic medium induces IMPDH cytoophidium assembly**

795 **in multiple cell lines.** (A) Immunofluorescence of wildtype HEK 293T cells

796 treated with sucrose at different concentrations for 1 hour. (B) Quantification of

797 the percentage of cells with cytoophidia under the treatments shown in (A). (C)

798 Immunofluorescence of wildtype HeLa, MCF7 and HCT116 cells treated with

799 sucrose at different concentrations for 1 hour. (D) Quantification of the



800 percentage of cells with cytoophidia under the treatments shown in (C). Scale  
801 bars = 20  $\mu\text{m}$  in all panels. Error bars = S.E.M. Tukey's test was used in the  
802 comparison in (B) and (D).

803

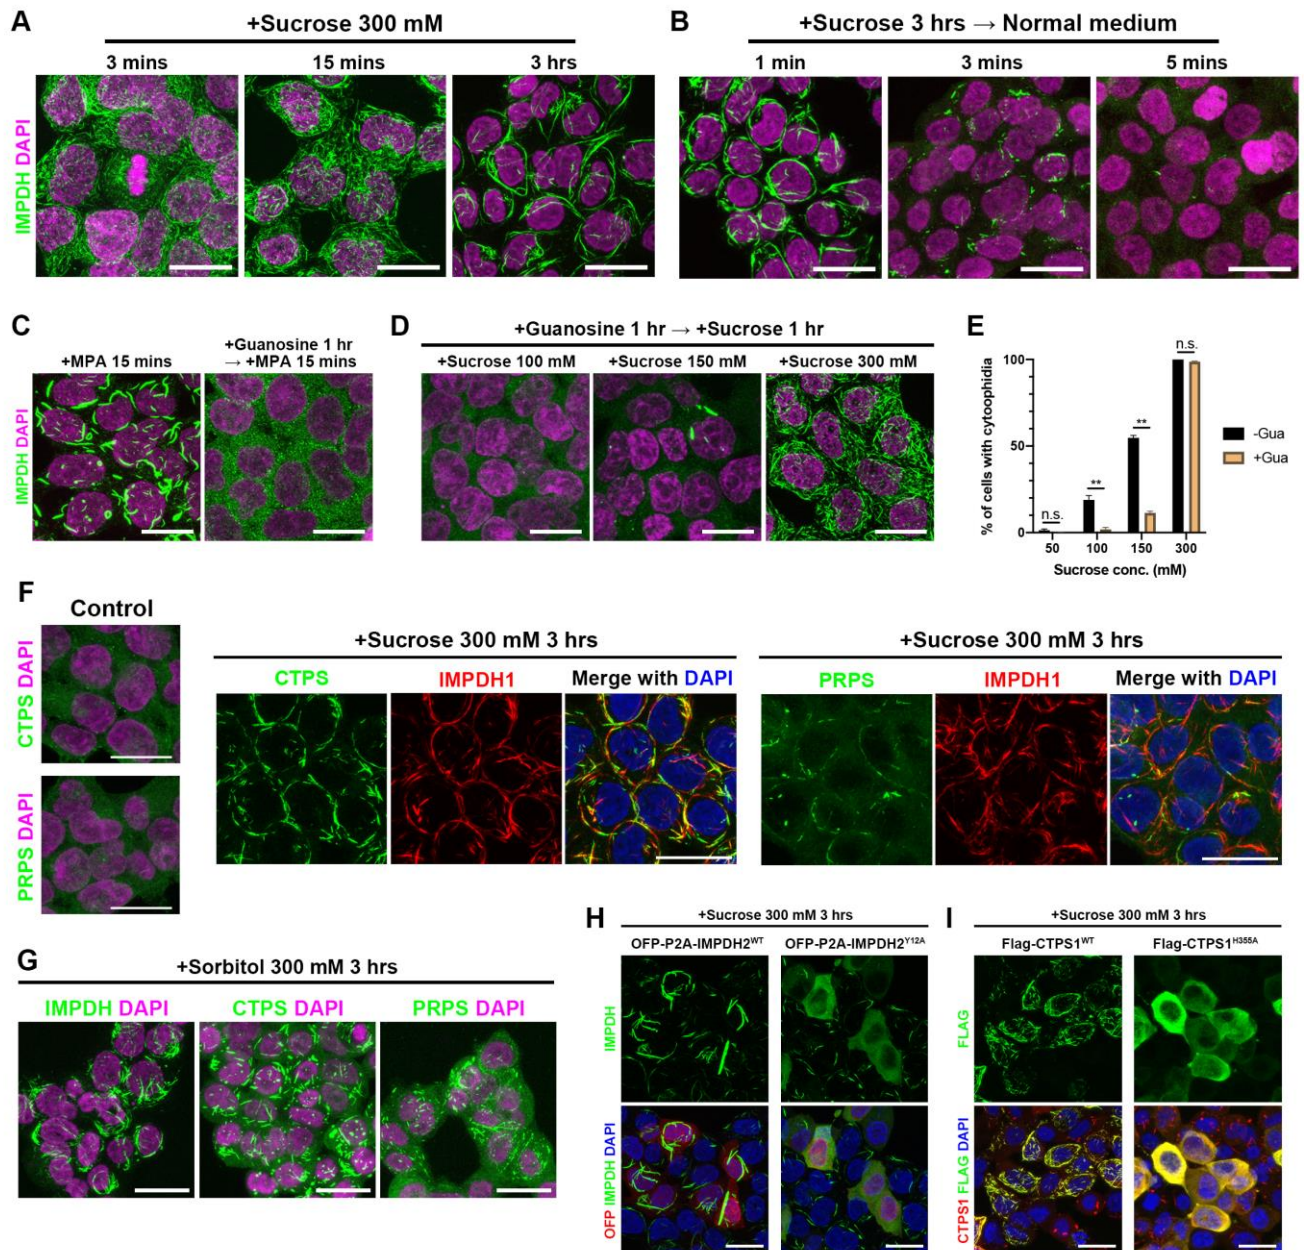

804

805 **Figure 5**

806

807 **Figure 5. Hyperosmotic medium induces the protein polymerization and**  
808 **aggregation of filamentous polymers.** (A) Immunofluorescence of wildtype  
809 HEK 293T cells treated with 300 mM sucrose for different periods of time. (B)  
810 Immunofluorescence of wildtype HEK 293T cells pre-treated with 300 mM  
811 sucrose for 3 hours then treated with isosmotic medium for 1 to 5 minutes. (C)  
812 and (D) Immunofluorescence of wildtype HEK 293T cells pre-treated with 100  
813  $\mu$ M guanosine for 1 hour and then treated with 100  $\mu$ M MPA (C) or sucrose (D).  
814 (E) Quantitative data of the presence of hyperosmolality-induced cytoophidia in  
815 HEK 293T cells pre-treated with and without guanosine. (F)  
816 Immunofluorescence of wildtype HEK 293T cells for hyperosmolality-induced  
817 CTPS, PRPS and IMPDH cytoophidium. (G) Immunofluorescence of wildtype  
818 HEK 293T cells for CTPS, PRPS and IMPDH cytoophidium in the medium  
819 containing 300 mM sorbitol. (H) and (I) Immunofluorescence for IMPDH and  
820 CTPS in HEK 293T cells expressing OFP-P2A-IMP2<sup>WT</sup>, OFP-P2A-  
821 IMP2<sup>Y12A</sup>, Flag-CTPS1<sup>WT</sup> and Flag-CTPS1<sup>H355A</sup>. Scale bars = 20  $\mu$ m in all  
822 panels. Error bars = S.E.M. Student's *t* test, \*\**p* < 0.01 in (E).

823

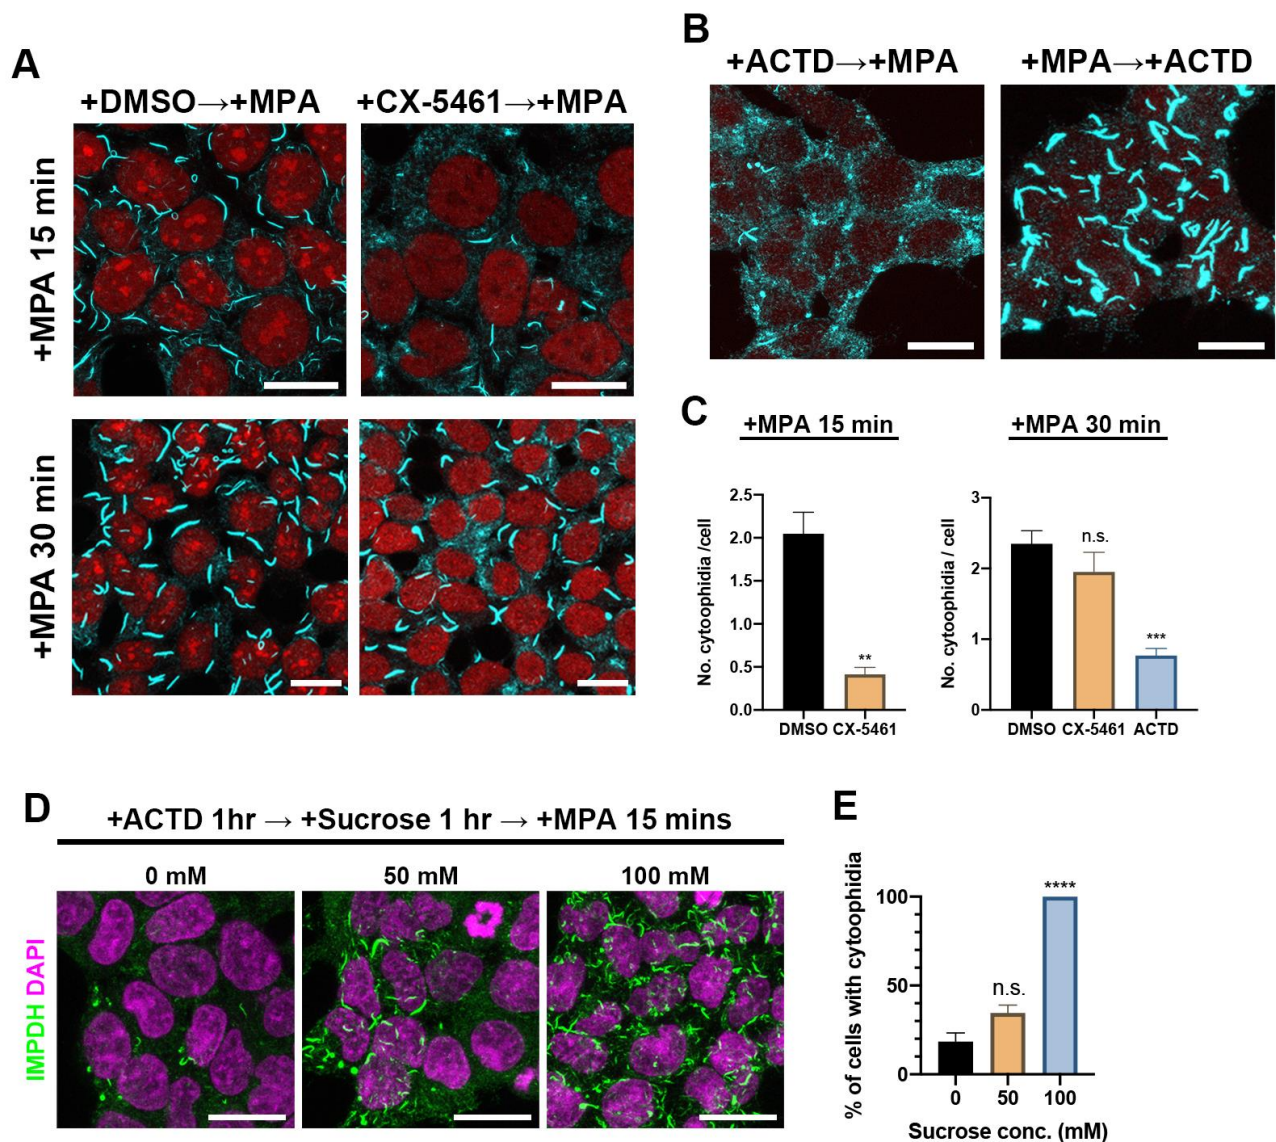

824

825

826 **Figure 6. Inhibition of transcription perturbs the MPA-induced IMPDH**

827 **cytoophidium assembly.** (A) Immunofluorescence of wildtype HEK 293T cells

828 treated with DMSO or 1  $\mu$ M CX-5461 for 3 hours prior to 15 and 30 minutes of

829 MPA treatment. (B) Immunofluorescence of wildtype HEK 293T cells treated

830 with 1  $\mu$ M ACTD for 1 hour before or after the treatment of MPA. (C) Quantitative

831 data of the abundance of IMPDH cytoophidia under different treatments shown

832 in (A) and (B). (D) Immunofluorescence of wildtype HEK 293T cells treated with

833 ACTD for 1 hour and sucrose for another 1 hour prior to cytoophidium induction  
834 with MPA. (E) Quantitative data of the proportion of cells with cytoophidia in the  
835 conditions shown in (D). Scale bars = 20  $\mu$ m in all panels. Error bars = S.E.M.  
836 Student's *t* test, \*\* $p < 0.01$ , \*\*\*  $p < 0.001$ , \*\*\*\*  $p < 0.0001$  in (C) and (E).  
837

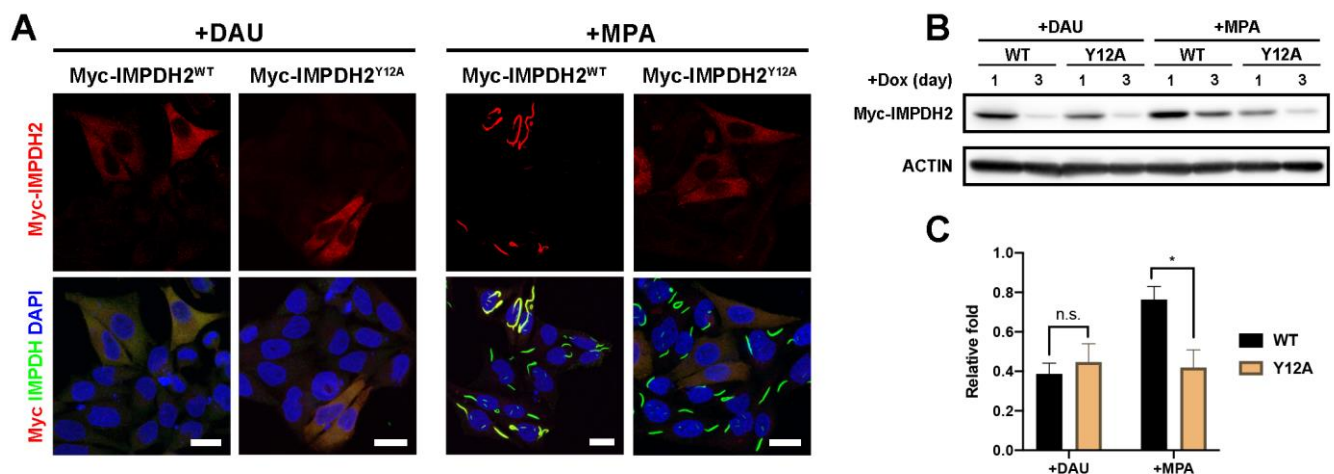

838

839

840 **Figure 7. Formation of the cytoophidium prolongs the half-life of IMPDH2**  
841 **protein** (A) Immunofluorescence of myc-IMPDH2<sup>WT</sup> and myc-IMPDH2<sup>Y12A</sup>  
842 overexpressing HeLa cells treated with DAU or MPA for 1 day. (B) Western  
843 blotting for the exogenous myc-IMPDH2 levels in transected HeLa cells treated  
844 with DAU or MPA for 1 and 3 days. (C) Quantitative data of the relative myc-  
845 IMPDH2 levels in the western blotting shown in (B). Scale bars = 20  $\mu$ m in all  
846 panels. Error bars = S.E.M. Student's *t* test, \* $p < 0.05$ .

847

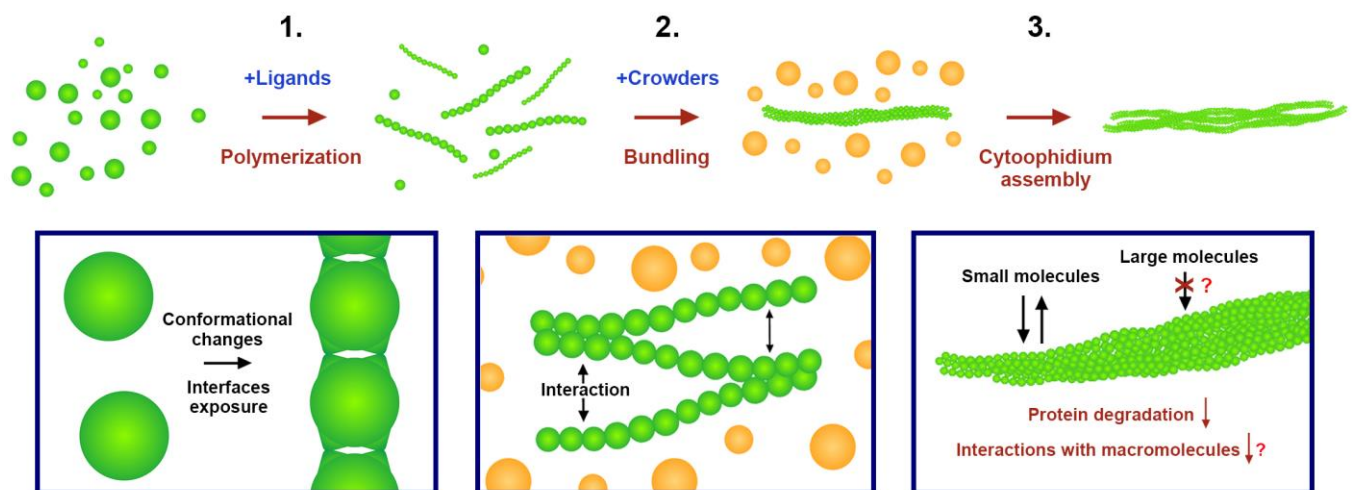

848

849

850 **Figure 8. Illustration of the proposed molecular mechanism for the**  
851 **assembly of the cytoophidium.** 1. Protein oligomers (octamer for IMPDH)  
852 polymerize into filamentous polymers under the regulation of conformational  
853 changes driven by the binding of ligands. Such conformational changes may  
854 expose or hide the interfaces responsible for the interactions between  
855 protomers. 2. Polymers self-associate into filament bundles through  
856 electrostatic interactions, which could be regulated by salt, pH, post-  
857 translational modifications, protein concentrations and molecular crowding.  
858 Such compact structures of filament bundles may allow small molecules  
859 percolate through the aggregate but restrict the interaction between  
860 macromolecules and component proteins. 3. Filament bundles may further  
861 assemble into larger structures, such as the cytoophidium.

862

863

864 **Molecular Crowding Facilitates Bundling of IMPDH Polymers and**  
865 **Cytoophidium Formation**

866

867 Chia-Chun Chang<sup>1</sup>, Min Peng<sup>2</sup>, Jiale Zhong<sup>1</sup>, Ziheng Zhang<sup>1</sup>, Gerson Dierley  
868 Keppeke<sup>1, 3</sup> Li-Ying Sung<sup>2,4</sup>, Ji-Long Liu<sup>1 \*</sup>

869

870 **Supplementary information**

871

872 **Supplementary figures S1 and S2**

873

874 **Supplementary movies S1 - S3**

875

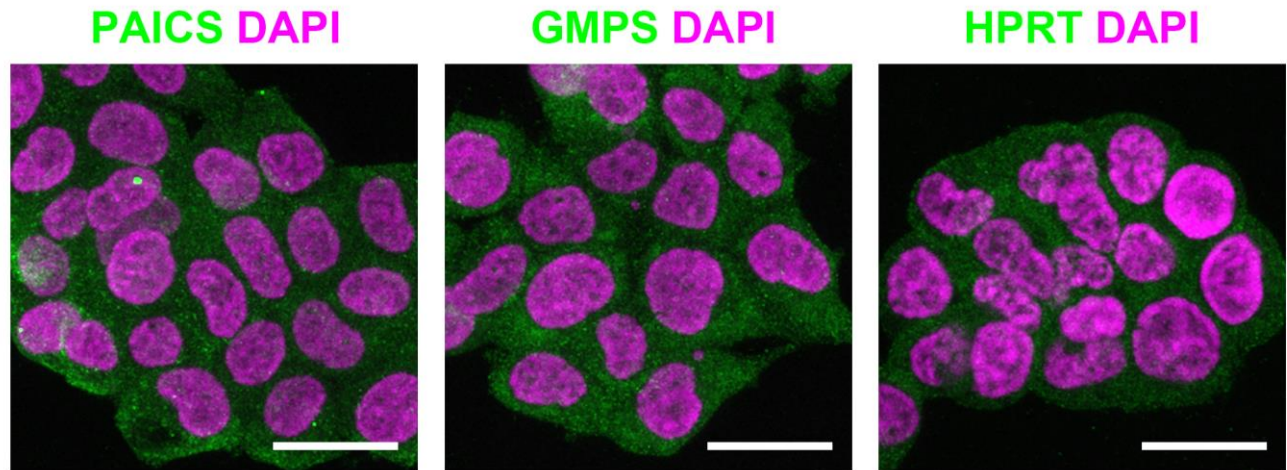

876

877

878 **Figure S1. Hyperosmotic medium does not induce the aggregation of**  
879 **PAICS, GMPS and HPRT.** Immunofluorescence of wildtype HEK 293T cells  
880 treated with 300 mM sucrose for 3 hours. No detectable aggregates of PAICS,  
881 GMPS or HPRT were observed in the cells. Scale bars = 20 μm.

882

883



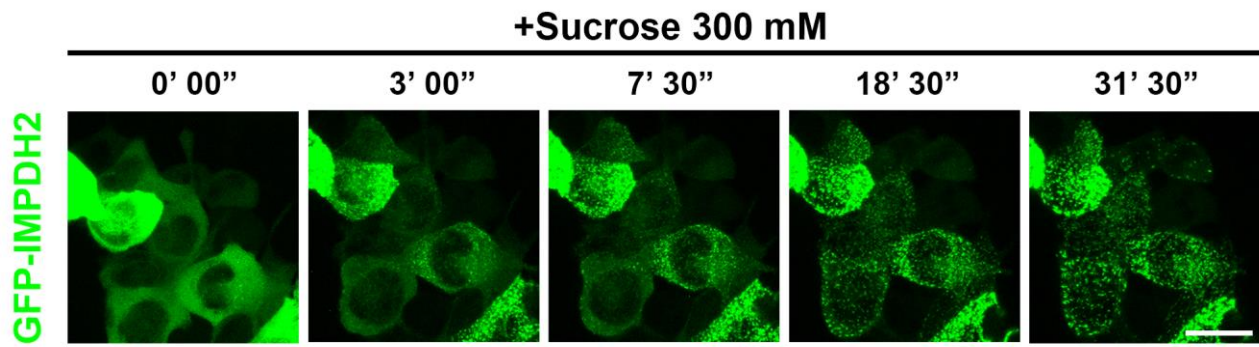

884

885

886 **Figure S2. The aggregation of GFP-IMP2H2 under the treatment of**  
887 **hyperosmotic medium.** Representative frames of live-cell imaging of GFP-  
888 IMP2H2 expressing HEK 293T cells treated with sucrose (300 mM). Scale  
889 bars = 20  $\mu$ m.

890

891

892 **Movie S1. Live-cell imaging showing the dynamics of IMPDH amorphous**  
893 **clumps.** OFP-IMPDH2 expressing HeLa cells were treated with MPA. Time  
894 intervals of each frame is 40 seconds.

895

896 **Movie S2. Live-cell imaging showing an IMPDH amorphous clump**  
897 **transforms in association with the ER.** GFP-Sec61 $\beta$  (green) and OFP-  
898 IMPDH2 (red) expressing HeLa cells were treated with MPA. Time intervals of  
899 each frame is 5 seconds.

900

901 **Movie S3. Live-cell imaging showing the transformation of IMPDH**  
902 **amorphous clumps to filaments.** OFP-IMPDH2 expressing HeLa cells were  
903 treated with MPA. Time intervals of each frame is 60 seconds.

904

905
